# Supplementary material for: Adherence to mask wearing and social distancing and use of lateral flow tests during the COVID19 pandemic in England and Wales based on the Virus Watch community cohort study
Source: Research Square preprint supplement (doi:10.21203/rs.3.rs-6369060/v1), 2025-05-28
Supplement: Supplementary file 1 [file 19aae3b9dff78a54486ff0b7.docx]

**Supplementary file**

**Table S1**. Questionnaire items and response options for frequency and change in frequency of use for mask wearing and

social distancing (Survey 1).

| **Questionnaire item** | **Response options** |
| --- | --- |
| a) **How often have you done the following over the past month:** | - All of the time  - Most of the time  - Some of the time  - Rarely  - Never |
| I wear a face covering in public, indoor places |
| I keep a 1+metre distance from people I don’t live with. |
| **b) Have you changed any of the following as a result of having had one/two doses of the vaccine** | - More frequently  - No change    - Less frequently |
| Wearing a face covering in public, indoor places |
| Maintaining a 1m+ distance from people you don’t live with |
| Meeting friends or family you don’t live with, either at your home or their home |
| Visiting public indoor places (e.g., restaurant, café, cinema) with people you don’t live with |
| Visiting public outdoor places (e.g., parks) with people you don’t live with |
| Using public transport |

**Table S2**. Questionnaire items and response options categorised according to COM-B domains (Survey 1).

| **Questionnaire item** | | **Response options** |
| --- | --- | --- |
| **Motivation Factors - Reflective** | | 5 – Strongly Agree  4 – Agree  3 – Neither Agree or Disagree  2 – Disagree  1 – Strongly Disagree |
| I can no longer catch Covid-19 after having one/two doses of the vaccine |  |
| I can still pass Covid-19 on to others even after having one/two doses of the vaccine* |
| Covid-19 continues to pose a risk to one or more of my friends or relatives, despite them having the vaccine* |
| The risks of Covid-19 are being exaggerated |
| The elderly and vulnerable are protected from Covid-19 now that vaccination is available |
| **Motivation Factors – Automatic** | | 5 – Strongly Agree  4 – Agree  3 – Neither Agree or Disagree  2 – Disagree  1 – Strongly Disagree |
| I feel protected against coronavirus, now that I have had one/two doses of the vaccine |
| New coronavirus variants worry me, even though I have had one/two doses of the vaccine |
| The thought of getting long Covid worries me, even though I have had one/two doses of the vaccine |
| When I can, I avoid close, physical contact with others outside my household even though I have had one/two doses of the vaccine |
| **Opportunity Factors - Social** | | 5 – All  4 – Most  3 – Some  2 – A Few  1 – None |
| How many of your relatives and friends who have had the vaccine are maintaining social distancing when they’re with people from other households |
| How many of your relatives and friends who have had the vaccine are wearing a face covering when in public, indoor spaces |
| **Capability Factors - Psychological** | | 5 – Definitely  4 – Probably  3 – Don’t Know  2 – Probably Not  1 – Definitely Not |
| Do you think that people can get seriously ill from Covid-19 after having one dose of the vaccine? |
| Do you think that people can get seriously ill from Covid-19 after having two doses of the vaccine? | |

NB: *Scores were reverse-coded

**Table S3**. Questionnaire items about interpreting a positive or negative test (Survey 2).

| **If you get a positive result from a lateral flow test,**  **it means:** | **If you get a negative result from a lateral flow test,**  **it means:** | **Response options** |
| --- | --- | --- |
| I’m infected with COVID-19 | It’s safe to mix with people from outside my household | - Definitely  - Probably  - Don’t know  - Probably not  - Definitely not |
| I might infect others | I need to get a PCR test |
| I need to get a PCR test | I need to report my test result |
| I need to self-isolate |  |
| Others who live with me will need to self-isolate |  |
| I need to report my test result |  |

**Table S4**. Statements for never having done a LFT categorised as capability, opportunity, and motivational factors (Survey 2).

| **Capability Factor** | **Response options** |
| --- | --- |
| I don’t know where to get tested or where to get a hold of tests | 5 – Strongly Agree  4 – Agree  3 – Neither Agree or Disagree  2 – Disagree  1 – Strongly Disagree |
| **Opportunity Factor (social)** |
| I have not needed to |
| **Opportunity Factor (physical)** |
| I can’t afford to self-isolate for practical or financial reasons |
| **Motivation Factors (reflective)** |
| I don’t believe it is accurate |
| I don’t want to have to report my test result |
| I don’t want to or am unable to self-isolate |
| I don’t believe in testing |
| I don’t think Covid-19 poses a risk to me |
| I’m vaccinated so I can’t catch Covid-19 |
| **Motivation Factors (automatic)** |
| It is unpleasant or uncomfortable |
| It’s a hassle |

**Table S5.** Mean and standard deviations of COM-B factors and Cronbach’s Alpha per domain

|  | | | **One Dose**  *mean (sd)* | **Two Doses**  *mean (sd)* | |
| --- | --- | --- | --- | --- | --- |
| **Motivation Factors - Reflective** | | | *(alpha=0.623)* | *(alpha=0.628)* | |
| I can no longer catch Covid-19 after having one/two doses of the vaccine | | 1.56 (0.72) | 1.52 (0.78) | | |
| I can still pass Covid-19 on to others even after having one/two doses of the vaccine | | 1.84 (0.98) | 1.76 (1.03) | | |
| Covid-19 continues to pose a risk to one or more of my friends or relatives, despite them having the vaccine | | 1.91 (0.86) | 1.89 (0.99) | | |
| The risks of Covid-19 are being exaggerated | | 2.05 (1.07) | 1.60 (0.89) | | |
| The elderly and vulnerable are protected from Covid-19 now that vaccination is available | | 2.53 (1.13) | 2.35 (1.15) | | |
| **Motivation Factors – Automatic** | | | | *(alpha=0.815)* | *(alpha=0.778)* |
| I feel protected against coronavirus, now that I have had one/two doses of the vaccine | | 2.51 (1.01) | 2.95 (1.09) | | |
| New coronavirus variants worry me, even though I have had one/two doses of the vaccine | | 3.72 (1.00) | 3.91 (0.94) | | |
| The thought of getting long Covid worries me, even though I have had one/two doses of the vaccine | | 3.54 (1.14) | 3.80 (0.96) | | |
| When I can, I avoid close, physical contact with others outside my household even though I have had one/two doses of the vaccine | | 3.79 (1.053) | 4.06 (0.90) | | |
|  | | | **Either one or two doses**  *mean (sd)* | | | | |
| **Opportunity Factors - Social** | | | | *(alpha=0.776)* | |
| How many of your relatives and friends who have had the vaccine are maintaining social distancing when they’re with people from other households | | 3.87 (1.17) | | | |
| How many of your relatives and friends who have had the vaccine are wearing a face covering when in public, indoor spaces | | 3.95 (1.08) | | | |
| **Capability Factors - Psychological** | | | *(alpha-0.742)* | | |
| Do you think that people can get seriously ill from Covid-19 after having one dose of the vaccine? | | 4.43 (0.74) | | | |
| Do you think that people can get seriously ill from Covid-19 after having two doses of the vaccine? | | | | | 3.86 (1.077) | | | |

**Table S6.** Test for multicollinearity of COM-B factors using Variance Inflation Factor (VIF)

|  | | | **One Dose**  *VIF* | | | | **Two Doses**  *VIF* | |
| --- | --- | --- | --- | --- | --- | --- | --- | --- |
| **Motivational Factors – Reflective** | | |  | | | |  | |
| I can no longer catch Covid-19 after having one/two doses of the vaccine | | 1.342 | | | | 1.216 |
| I can still pass Covid-19 on to others even after having one/two doses of the vaccine | | 1.253 | | | | 1.434 |
| Covid-19 continues to pose a risk to one or more of my friends or relatives, despite them having the vaccine | | 1.522 | | | | 1.529 |
| The risks of Covid-19 are being exaggerated | | 1.810 | | | | 1.283 |
| The elderly and vulnerable are protected from Covid-19 now that vaccination is available | | 1.504 | | | | 1.407 |
| **Motivation Factors – Automatic** | | | | |  | | | |  |
| I feel protected against coronavirus, now that I have had one/two doses of the vaccine | | 1.557 | | | | 1.444 |
| New coronavirus variants worry me, even though I have had one/two doses of the vaccine | | 2.569 | | | | 2.086 |
| The thought of getting long Covid worries me, even though I have had one/two doses of the vaccine | | 1.968 | | | | 2.121 |
| When I can, I avoid close, physical contact with others outside my household even though I have had one/two doses of the vaccine | | 2.017 | | | | 1.412 |
|  | |  | | | |  |
| **Opportunity Factors - Social** | | |  | | |  | | |
| How many of your relatives and friends who have had the vaccine are maintaining social distancing when they’re with people from other households | | 2.507 | | | 1.685 | |
| How many of your relatives and friends who have had the vaccine are wearing a face covering when in public, indoor spaces | | 2.540 | | | 1.678 | |
| **Capability Factors - Psychological** | | | | |  |  | | |
| Do you think that people can get seriously ill from Covid-19 after having one dose of the vaccine? | | 2.823 | | | 1.756 | |
| Do you think that people can get seriously ill from Covid-19 after having two doses of the vaccine? | | | | | 2.617 | | 1.734 | |
